# Supplementary material for: Genome-wide analysis of the homeodomain-leucine zipper family in Lotus japonicus and the overexpression of LjHDZ7 in Arabidopsis for salt tolerance
Source: Front Plant Sci. 2022 Sep 14;13:955199. doi: 10.3389/fpls.2022.955199 (PMC9515785; doi:10.3389/fpls.2022.955199)
Supplement: Supplementary Table S2 — Basic physicochemical properties of the HD-Zip family in Arabidopsis thaliana. [file Table_2.XLSX]

## Sheet: Sheet1
Group	NO.	ID Number	Gene name	Protein length (aa)	MW(Da)	PI
Ⅰ	1	AT3G01470.1	ATHB1	272	30933.1	4.5368
	2	AT5G15150.1	ATHB3	314	36282.1	6.8667
	3	AT5G65310.1	ATHB5	312	34790.6	4.754
	4	AT2G22430.1	ATHB6	311	35017.6	4.4705
	5	AT2G46680.1	ATHB7	258	30510.8	5.4852
	6	AT3G61890.1	ATHB12	235	27485.4	4.9093
	7	AT1G69780.1	ATHB13	294	33342	5.4002
	8	AT4G40060.1	ATHB16	294	33394.6	4.8839
	9	AT3G01220.1	ATHB20	286	33075.8	5.9787
	10	AT2G18550.1	ATHB21	220	25700.7	5.1011
	11	AT2G36610.1	ATHB22	185	21831.9	9.122
	12	AT1G26960.1	ATHB23	255	29662.9	4.8016
	13	AT4G36740.1	ATHB40	216	25079.9	4.862
	14	AT5G03790.1	ATHB51	235	26840.2	9.452
	15	AT5G53980.1	ATHB52	156	17934.1	7.985
	16	AT5G66700.1	ATHB53	228	26391.6	5.7329
	17	AT1G27045.1	ATHB54	227	26623.8	4.9649
Ⅱ	18	AT2G01430.1	ATHB17	275	31689.5	9.481
	19	AT1G70920.1	ATHB18	206	23519.5	8.6637
	20	AT2G22800.1	HAT9	274	29877.6	7.6794
	21	AT4G37790.1	HAT22	278	30729.6	8.1506
	22	AT4G17460.1	HAT1	282	31554.6	8.5945
	23	AT5G47370.1	HAT2	283	31727.5	7.8695
	24	AT4G16780.1	ATHB2	284	31852.5	9.0241
	25	AT3G60390.1	HAT3	315	34747.1	8.3772
	26	AT2G44910.1	ATHB4	318	34815.8	9.6041
	27	AT5G06710.1	HAT14	336	37603.2	8.273
Ⅲ	28	AT2G34710.1	ATHB14	852	93217.8	6.1505
	29	AT1G30490.1	ATHB9	841	92401.7	6.3674
	30	AT5G60690.1	REV	842	92438.2	5.8476
	31	AT1G52150.1	ATHB15	836	91701.1	6.3679
	32	AT4G32880.1	ATHB8	833	91996.2	6.2358
Ⅳ	33	AT3G61150.1	HDG1	808	88166.7	6.6855
	34	AT1G05230.4	HDG2	721	79423.6	5.7353
	35	AT2G32370.1	HDG3	725	80070.3	6.5098
	36	AT4G17710.1	HDG4	709	79277.3	6.6254
	37	AT5G46880.1	HDG5	826	92120.4	5.1953
	38	AT4G25530.1	HDG6	686	76252.9	7.3879
	39	AT5G52170.1	HDG7	682	75638.1	6.0005
	40	AT3G03260.1	HDG8	699	78426.2	6.3178
	41	AT5G17320.1	HDG9	718	81068.1	7.6263
	42	AT1G34650.1	HDG10	708	80058.3	8.0653
	43	AT1G73360.1	HDG11	722	79120.2	6.6867
	44	AT1G17920.1	HDG12	687	76527	6.7015
	45	AT1G79840.1	ATHB10	747	83206.6	6.4768
	46	AT4G00730.1	ANL2	802	87194.2	6.1585
	47	AT4G21750.1	ATML1	762	83490.1	5.7192
	48	AT4G04890.1	PDF2	743	81530.1	5.7576
