# Supplementary material for: Genome-wide analysis of the homeodomain-leucine zipper family in Lotus japonicus and the overexpression of LjHDZ7 in Arabidopsis for salt tolerance
Source: Front Plant Sci. 2022 Sep 14;13:955199. doi: 10.3389/fpls.2022.955199 (PMC9515785; doi:10.3389/fpls.2022.955199)
Supplement: Supplementary Table S3 — Basic physicochemical properties of the HD-Zip family in Medicago truncatula. [file Table_3.XLSX]

## Sheet: Sheet1
Group	NO.	ID Number	Protein length (aa)	MW(Da)	PI	AtHDZ Ortholog
Ⅰ	1	Medtr4g107650.1	338	38938.6	4.4933	AT3G01470.1
	2	Medtr5g038280.1	325	36835.7	4.4306	AT3G01470.1
	3	Medtr6g007647.1	288	32969.5	4.4545	AT3G01470.1
	4	Medtr8g469430.1	287	33303.1	4.4653	AT3G01470.1
	5	Medtr6g011610.1	278	31940.5	6.9588	AT5G15150.1
	6	Medtr3g080100.1	256	29767.3	4.7863	AT5G65310.1
	7	Medtr8g089895.1	312	35261	4.3325	AT2G22430.1
	8	Medtr8g026960.1	242	28039.1	4.9054	AT2G46680.1
	9	Medtr3g092150.1	246	29045.2	5.2031	AT2G46680.1
	10	Medtr8g468210.1	283	32194.9	5.9281	AT1G69780.1
	11	Medtr5g039000.1	284	32504.3	6.3532	AT1G69780.1
	12	Medtr3g086790.1	303	34625.4	4.8489	AT4G40060.1
	13	Medtr7g010020.1	273	31182.8	6.438	AT3G01220.1
	14	Medtr5g019680.1	208	24669.9	7.0633	AT4G36740.1
	15	Medtr5g019650.1	222	26055.5	6.5359	AT4G36740.1
	16	Medtr7g103340.1	233	27162.3	6.7979	AT5G03790.1
	17	Medtr1g061660.1	233	27562.1	6.3692	AT5G03790.1
Ⅱ	18	Medtr4g084750.1	199	22632.9	8.9864	AT2G01430.1
	19	Medtr5g014890.1	271	30351.2	7.7676	AT4G37790.1
	20	Medtr4g097600.1	272	30274.9	7.8208	AT4G37790.1
	21	Medtr1g017090.1	289	32839.8	7.7197	AT4G37790.1
	22	Medtr2g038580.1	216	24770.9	7.1674	AT4G17460.1
	23	Medtr2g038625.1	216	24770.9	7.1674	AT4G17460.1
	24	Medtr5g013010.1	297	33591.7	7.3679	AT4G16780.1
	25	Medtr4g100550.1	281	31849	7.4457	AT4G16780.1
	26	Medtr8g006705.1	306	33363	7.7712	AT3G60390.1
	27	Medtr4g126900.1	221	25306	9.1546	AT3G60390.1
	28	Medtr7g093430.1	297	33152.2	7.3088	AT5G06710.1
	29	Medtr2g061030.1	340	37816.2	7.7297	AT5G06710.1
	30	Medtr3g103590.1	305	34378.5	7.0417	AT5G06710.1
	31	Medtr1g054285.1	297	33372.3	7.3435	AT5G06710.1
Ⅲ	32	Medtr2g030130.1	837	91666.5	6.457	AT2G34710.1
	33	Medtr4g058970.1	847	92661.6	6.1404	AT5G60690.1
	34	Medtr2g094520.1	840	91419	6.3681	AT5G60690.1
	35	Medtr8g013980.1	833	91899.2	6.5753	AT1G52150.1
	36	Medtr2g101190.1	837	92138.5	6.5764	AT1G52150.2
	37	Medtr3g109800.1	836	91750.1	6.2977	AT4G32880.1
Ⅳ	38	Medtr4g047800.1	735	79912.1	5.4487	AT1G05230.4
	39	Medtr2g088470.1	738	80440.9	5.6433	AT1G05230.4
	40	Medtr5g029320.1	802	89135.1	6.0946	AT5G46880.1
	41	Medtr2g030660.1	655	74364.9	6.7955	AT3G03260.1
	42	Medtr6g477820.1	729	80587.5	6.809	AT1G73360.1
	43	Medtr7g427700.1	436	48338.8	6.1844	AT1G73360.1
	44	Medtr7g427710.1	643	72300.2	6.859	AT1G73360.1
	45	Medtr2g030600.1	693	77727.8	6.9118	AT1G73360.1
	46	Medtr2g030570.1	700	78702.6	6.5452	AT1G73360.1
	47	Medtr2g101720.1	795	88414.3	6.0832	AT1G79840.1
	48	Medtr8g432540.1	811	88904.5	5.8989	AT4G00730.1
	49	Medtr7g076080.1	779	85731.5	6.6691	AT4G00730.1
	50	Medtr1g101280.1	754	82352.6	5.5544	AT4G00730.1
	51	Medtr0198s0030.1	756	82233.9	5.1338	AT4G00730.1
	52	Medtr5g005600.1	722	79894.1	7.8425	AT4G04890.1
