# Supplementary material for: Genome-wide analysis of the homeodomain-leucine zipper family in Lotus japonicus and the overexpression of LjHDZ7 in Arabidopsis for salt tolerance
Source: Front Plant Sci. 2022 Sep 14;13:955199. doi: 10.3389/fpls.2022.955199 (PMC9515785; doi:10.3389/fpls.2022.955199)
Supplement: Supplementary Table S4 — Basic physicochemical properties of the HD-Zip family in Trifolium pratense. [file Table_4.XLSX]

## Sheet: Sheet1
Group	NO.	ID Number	Protein length (aa)	MW(Da)	PI	AtHDZ Ortholog
Ⅰ	1	Tp57577_TGAC_v2_mRNA39684	334	38317.3	4.6012	AT3G01470.1
	2	Tp57577_TGAC_v2_mRNA2318	288	32840.4	4.4421	AT3G01470.1
	3	Tp57577_TGAC_v2_mRNA10715	296	34094.8	6.9369	AT5G15150.1
	4	Tp57577_TGAC_v2_mRNA35677	247	28680.2	5.5421	AT5G65310.1
	5	Tp57577_TGAC_v2_mRNA6454	309	35063.6	4.5138	AT2G22430.1
	6	Tp57577_TGAC_v2_mRNA6455	309	35063.6	4.5138	AT2G22430.1
	7	Tp57577_TGAC_v2_mRNA6453	304	34904.3	4.4665	AT2G22430.1
	8	Tp57577_TGAC_v2_mRNA34777	248	29052.1	5.0589	AT2G46680.1
	9	Tp57577_TGAC_v2_mRNA16446	269	30958.2	4.6214	AT2G46680.1
	10	Tp57577_TGAC_v2_mRNA34400	285	32374.1	6.109	AT1G69780.1
	11	Tp57577_TGAC_v2_mRNA4181	291	33188	6.4502	AT1G69780.1
	12	Tp57577_TGAC_v2_mRNA7986	161	18336.5	6.7814	AT1G69780.1
	13	Tp57577_TGAC_v2_mRNA16537	273	30668	5.1771	AT4G40060.1
	14	Tp57577_TGAC_v2_mRNA16538	273	30668	5.1771	AT4G40060.1
	15	Tp57577_TGAC_v2_mRNA19483	573	66324.8	5.0195	AT4G36740.1
	16	Tp57577_TGAC_v2_mRNA32555	149	17637	8.8231	AT5G03790.1
	17	Tp57577_TGAC_v2_mRNA5895	232	27403.9	6.6766	AT5G03790.1
Ⅱ	18	Tp57577_TGAC_v2_mRNA39620	213	24318.8	8.9812	AT2G01430.1
	19	Tp57577_TGAC_v2_mRNA29832	308	35057	9.1991	AT4G37790.1
	20	Tp57577_TGAC_v2_mRNA31237	253	28868.3	8.1368	AT4G37790.1
	21	Tp57577_TGAC_v2_mRNA33705	149	17035.2	8.4804	AT4G37790.1
	22	Tp57577_TGAC_v2_mRNA3802	280	30887.5	7.8047	AT4G37790.1
	23	Tp57577_TGAC_v2_mRNA30083	270	30917.1	7.7146	AT4G16780.1
	24	Tp57577_TGAC_v2_mRNA5571	222	25681.1	9.447	AT4G16780.1
	25	Tp57577_TGAC_v2_mRNA34267	353	39305.8	6.3722	AT3G60390.1
	26	Tp57577_TGAC_v2_mRNA18858	279	31090	8.3781	AT5G06710.1
	27	Tp57577_TGAC_v2_mRNA13490	290	32793.5	4.8628	AT5G06710.1
	28	Tp57577_TGAC_v2_mRNA16534	311	35360.1	6.6635	AT5G06710.1
	29	Tp57577_TGAC_v2_mRNA12072	372	41158.7	7.4485	AT5G06710.1
Ⅲ	30	Tp57577_TGAC_v2_mRNA27227	858	93881.1	6.4105	AT2G34710.1
	31	Tp57577_TGAC_v2_mRNA16082	896	98385.6	6.3692	AT5G60690.1
	32	Tp57577_TGAC_v2_mRNA11991	868	94531.5	6.1401	AT5G60690.1
	33	Tp57577_TGAC_v2_mRNA36204	839	92484.9	6.607	AT1G52150.1
	34	Tp57577_TGAC_v2_mRNA38416	840	92233.5	6.5764	AT1G52150.1
	35	Tp57577_TGAC_v2_mRNA15597	803	88732.9	7.2816	AT4G32880.1
Ⅳ	36	Tp57577_TGAC_v2_mRNA4322	737	80469.9	5.6408	AT1G05230.4
	37	Tp57577_TGAC_v2_mRNA4323	737	80469.9	5.6408	AT1G05230.4
	38	Tp57577_TGAC_v2_mRNA4324	770	83815.7	5.7544	AT1G05230.4
	39	Tp57577_TGAC_v2_mRNA4750	734	80080.4	5.4417	AT1G05230.4
	40	Tp57577_TGAC_v2_mRNA27255	702	80212.4	6.0504	AT1G73360.1
	41	Tp57577_TGAC_v2_mRNA38406	805	89957.5	6.456	AT1G79840.1
	42	Tp57577_TGAC_v2_mRNA1498	688	77363.6	6.1744	AT4G00730.2
	43	Tp57577_TGAC_v2_mRNA18019	792	86700.4	6.0824	AT4G00730.1
	44	Tp57577_TGAC_v2_mRNA39106	813	89272	6.4298	AT4G00730.1
	45	Tp57577_TGAC_v2_mRNA11117	525	58486.1	6.0396	AT4G00730.2
	46	Tp57577_TGAC_v2_mRNA8586	759	83586.8	5.338	AT4G04890.1
